# Supplementary material
Source: MDPI journal article supplement (https://www.mdpi.com/2073-4395/13/8/2166)
Supplement: s1 [file s1]

**Table S1.** Studies that integrated the database.

| References                  | Country   | Weather  | Soil type                | Rain<br>(mm/year) | Mean<br>temperature<br>(°C) | Mean<br>altitude<br>(m.a.s.l.) | Observations | Number<br>of<br>indicators | Indicators that<br>made up the<br>SQI                                                                                                                                                                      |
|-----------------------------|-----------|----------|--------------------------|-------------------|-----------------------------|--------------------------------|--------------|----------------------------|------------------------------------------------------------------------------------------------------------------------------------------------------------------------------------------------------------|
| Romaniuk et al., 2011) [1]  | Argentina | ---      | Arguidol                 | ---               | ---                         | ---                            | 1            | 5                          | SOC, POM-C, MBC, SMR and qCO <sub>2</sub>                                                                                                                                                                  |
| (Mukherjee & Lal, 2015) [2] | EE.UU.    | ---      | Loamy loam               | ---               | ---                         | ---                            | 6            | 4                          | SOC, AWC, WSA and pH                                                                                                                                                                                       |
| (Askari & Holden, 2015) [3] | Ireland   | ---      | Luvisols and brown soils | 875               | 9.9                         |                                | 6            | 7                          | BD, PR, Mg, C/N, TN, SMR and ASD                                                                                                                                                                           |
| (Cherubin et al., 2016) [4] | Brazil    | Tropical | Oxisols                  | ---               | ---                         | ---                            | 1            | 38                         | P, S, K, Ca, Mg, B, Cu, Fe, Mn, Zn, CEC, H+Al, pH, BS, BD, SDC, PR, MaP, MiP, Porosity, WFPS, SWSC, SAC, K <sub>fs</sub> , AGS, MWD, VESS, SSI, SOC, TN, MBC, MBN, BG, AcP, Eworm, Mdens, Mrich and Mdiver |
|                             |           |          |                          |                   |                             |                                | 1            | 7                          | SOC, SAC, Ph, K <sub>fs</sub> , Mdiver, BG and Mdens                                                                                                                                                       |

| References                                           | Country | Weather      | Soil type                     | Rain<br>(mm/year) | Mean<br>temperature<br>(°C) | Mean<br>altitude<br>(m.a.s.l.) | Observations | Number<br>of<br>indicators | Indicators that<br>made up the<br>SQI                                |
|------------------------------------------------------|---------|--------------|-------------------------------|-------------------|-----------------------------|--------------------------------|--------------|----------------------------|----------------------------------------------------------------------|
| (Nabiollahi et al., 2017) [5]                        | Iran    | Semi-arid    | Inceptisols                   | 369.8             | 10.8                        | 2250                           | 1            | 5                          | pH, EC, BD, ESP and CEC                                              |
|                                                      |         |              |                               |                   |                             |                                | 1            | 9                          | pH, SAR, EC, CCE, SOC, BD, CEC, ESP and MWD                          |
| (Apesteguía et al., 2017) [6]                        | Spain   | Dry subhumid | Haplic calcisols              | 525               | 13.5                        | 402                            | 2            | 9                          | BD, PR, MWD <sub>d</sub> , TN, P, K, CaCO <sub>3</sub> , SOC and MBC |
| (Mishra et al., 2017 [7]                             | India   | ---          | Clay loam and sandy clay loam | 225               | 24.05                       | 483.33                         | 1            | 6                          | AN, SOC, K, pH, Ca and P                                             |
| (Nabiollahi, Golmohamadi, et al., 2018) [8]          | Iran    | Semi-arid    | Inceptisols                   | 399               | 10.2                        | 2292.5                         | 2            | 9                          | k, MWD, pH, SOC, TNV, Porosity, CEC, BD and EC                       |
|                                                      |         |              |                               |                   |                             |                                | 2            | 4                          | pH, k, Porosity and MWD                                              |
| (Nabiollahi, Taghizadeh-Mehrjardi, et al., 2018) [9] | ---     | ---          | ---                           | ---               | ---                         | ---                            | 2            | 9                          | P, MWD, pH, SOC, CCE, TN, CEC, BD and EC                             |
|                                                      |         |              |                               |                   |                             |                                | 2            | 4                          | EC, SOC, CEC and MWD                                                 |
| (Yu et al., 2018) [10]                               | China   | Semi-arid    | Solonetz                      | 427               | 5.9                         | ---                            | 4            | 4                          | INV, N/P, WEOC and LC                                                |

| References                            | Country | Weather  | Soil type                | Rain<br>(mm/year) | Mean<br>temperature<br>(°C) | Mean<br>altitude<br>(m.a.s.l.) | Observations | Number<br>of<br>indicators | Indicators that<br>made up the<br>SQI                    |
|---------------------------------------|---------|----------|--------------------------|-------------------|-----------------------------|--------------------------------|--------------|----------------------------|----------------------------------------------------------|
| (Budak et al., 2018) [11]             | Turkey  | ---      | ---                      | 474.9             | 15.8                        | 931                            | 1            | 5                          | pH, CaCO <sub>3</sub> , AS, K, and P                     |
| (Chandel et al., 2018) [12]           | India   | ---      | Haplustepts              | 1090              | 22.5                        | 385                            | 1            | 6                          | SOC, K, EC, k, Clay and PAW                              |
| (Mei et al., 2019) [13]               | China   | Semi-wet | Brunisolic               | 675               | 6.3                         | ---                            | 2            | 3                          | AN, TN and SOM                                           |
| (Klimkowicz-Pawlas et al., 2019) [14] | Poland  | ---      | Luvisols                 | 6407.8            | ---                         | ---                            | 1            | 4                          | TN, HU, NIT and DHA                                      |
| (Mahajan et al., 2020) [15]           | India   | Tropical | Coastal plains           | 2139              | 27.4                        | 0                              | 1            | 15                         | pH, EC, BD, N, P, K, S, B, Fe, Mn, Cu, Zn, Ca, Mg and Na |
|                                       |         |          |                          |                   |                             |                                | 2            | 6                          | pH, Mn, BD, Cu, EC and Na                                |
|                                       |         |          |                          |                   |                             |                                | 2            | 8                          | SOC, TN, CEC, SMR, BD, CCE,                              |
| (Zeraatpisheh et al., 2020) [16]      | Iran    | ---      | Haptic luvisols          | 789               | 17.9                        | 35                             |              |                            | pH, EC                                                   |
|                                       |         |          |                          |                   |                             |                                | 2            | 5                          | SOC, CEC, CCE, pH and EC                                 |
| (Acir & Günal, 2020) [17]             | Turkey  | ---      | Petrocalcic calcixerepts | 333               | 11.08                       | 1051                           | 1            | 8                          | SAR, K, TOC, WFPS, pH, BD, AWC and P                     |

| References                            | Country | Weather           | Soil type  | Rain<br>(mm/year) | Mean<br>temperature<br>(°C) | Mean<br>altitude<br>(m.a.s.l.) | Observations | Number<br>of<br>indicators | Indicators that<br>made up the<br>SQI                                                                             |
|---------------------------------------|---------|-------------------|------------|-------------------|-----------------------------|--------------------------------|--------------|----------------------------|-------------------------------------------------------------------------------------------------------------------|
| (Bedolla-Rivera<br>et al., 2020) [18] | Mexico  | Semi-arid         | Chernozem  | 700               | 20                          | 1750                           | 5            | 4                          | WHC, Silt, N-<br>NO <sub>3</sub> and qCO <sub>2</sub>                                                             |
| (Zhou et al.,<br>2020) [19]           | China   | Semi-wet          | Mollisols  | 553.9             | 1.5                         | ---                            | 2            | 15                         | BD, WHC, pH,<br>SOM, TOC, TN,<br>N-NO <sub>3</sub> , N-NH <sub>4</sub> ,<br>P, K, INV, UA,<br>APA, MBC and<br>MBN |
|                                       |         |                   |            |                   |                             |                                | 3            | 5                          | BD, pH, SOM,<br>N-NO <sub>3</sub> and<br>APA                                                                      |
| (Zhao et al.,<br>2021) [20]           | China   | Semi-arid         | Entisols   | ---               | ---                         | ---                            | 5            | 5                          | N, NB, IPB,<br>SOM and INV                                                                                        |
| (Huang et al.,<br>2021) [21]          | China   | Humid<br>tropical | Ferralsols | 1450              | 18                          | 1345                           | 1            | 4                          | Fe, SOC, TN<br>and K                                                                                              |
| (Mahajan et al.,<br>2021) [22]        | India   | Warm              | Alfisols   | 3362.5            | 28                          | ---                            | 4            | 5                          | APA, SOC, P,<br>MBC and AN                                                                                        |

SOC, soil organic C; POM-C, particulate organic C fraction; SMR, soil microbial respiration; MBC, microbial biomass C; qCO<sub>2</sub>, microbial respiration coefficient; AWS, available water content; WSA, water-stable aggregates; pH, potential of hydrogen; BD, bulk density; PR, penetration resistance; Mg, magnesium; C/N, C and N ratio; TN, total N; ASD, aggregate size distribution; P, phosphorus; Porosity, S, sulfur; K, potassium; k, soil erodibility; Ca, calcium; B, boron; Cu, cooper; Fe, iron; Mn, manganese; Zn, zinc; CEC, cation exchange capacity; H+Al, potential acidity; BS, base saturation; SDC, soil degree of compactness; MaP, macroporosity; MiP, microporosity; WFPS, water-filled pore space; SWSC, soil water storage capacity; SAC, soil aeration capacity; K<sub>ts</sub>, field saturated hydraulic conductivity; AGS, macroaggregation stability; MWD, mean weight aggregate diameter; VESS, visual evaluation of soil structure; SSI, structural stability index; MBN, microbial biomass N; BG,  $\beta$ -glucosidase activity; AcP, acid phosphatase activity; Eworm, number of earthworms; Mdens, macrofauna density; MRich, macrofauna richness; Mdiver, macrofauna diversity; SAR, sodium adsorption ratio; CCE, carbonate calcium equivalent; ESP, exchangeable sodium percentage; MWD<sub>d</sub>, mean weight diameter in dry; CaCO<sub>3</sub>, carbonates as CaCO<sub>3</sub>; TNV, total neutralizing value; INV, invertase; N/P, N and P ratio; WEOC, water extractable organic C; LC, labile C; AS, aggregate stability; CLY, Clay; PAW, plant available water; AN, available N; SOM, soil organic matter; HU, humins; NIT, potential of nitrification; DHA, dehydrogenase activity;

Mg, magnesium; Na, sodium; AWC, available water content; WHC, water holding capacity; N-NO<sub>3</sub>, nitrates; Silt; UA, urease activity; APA, phosphatase activity; NB, nitrifying bacteria; IPB, inorganic phosphorus bacteria;

## References

1. Romaniuk, R.; Giuffré, L.; Costantini, A.; Bartoloni, N.; Nannipieri, P. A Comparison of Indexing Methods to Evaluate Quality of Soils: The Role of Soil Microbiological Properties. *Soil Res.* **2011**, *49*, 733, doi:10.1071/SR11147.
2. Mukherjee, A.; Lal, R. Comparison of Soil Quality Index Using Three Methods. *PLoS ONE* **2014**, *9*, e105981, doi:10.1371/journal.pone.0105981.
3. Askari, M.S.; Holden, N.M. Quantitative Soil Quality Indexing of Temperate Arable Management Systems. *Soil Tillage Res.* **2015**, *150*, 57–67, doi:10.1016/j.still.2015.01.010.
4. Cherubin, M.R.; Karlen, D.L.; Cerri, C.E.P.; Franco, A.L.C.; Tormena, C.A.; Davies, C.A.; Cerri, C.C. Soil Quality Indexing Strategies for Evaluating Sugarcane Expansion in Brazil. *PLOS ONE* **2016**, *11*, e0150860, doi:10.1371/journal.pone.0150860.
5. Nabiollahi, K.; Taghizadeh-Mehrjardi, R.; Kerry, R.; Moradian, S. Assessment of Soil Quality Indices for Salt-Affected Agricultural Land in Kurdistan Province, Iran. *Ecol. Indic.* **2017**, *83*, 482–494, doi:10.1016/j.ecolind.2017.08.001.
6. Apesteguía, M.; Virto, I.; Orcaiz, L.; Bescansa, P.; Enrique, A.; Imaz, M.; Karlen, D. Tillage Effects on Soil Quality after Three Years of Irrigation in Northern Spain. *Sustainability* **2017**, *9*, 1476, doi:10.3390/su9081476.
7. Mishra, G.; Marzaioli, R.; Giri, K.; Borah, R.; Dutta, A.; Jayaraj, R.S.C. Soil Quality Assessment under Shifting Cultivation and Forests in Northeastern Himalaya of India. *Arch. Agron. Soil Sci.* **2017**, *63*, 1355–1368, doi:10.1080/03650340.2017.1281390.
8. Nabiollahi, K.; Golmohamadi, F.; Taghizadeh-Mehrjardi, R.; Kerry, R.; Davari, M. Assessing the Effects of Slope Gradient and Land Use Change on Soil Quality Degradation through Digital Mapping of Soil Quality Indices and Soil Loss Rate. *Geoderma* **2018**, *318*, 16–28, doi:10.1016/j.geoderma.2017.12.024.
9. Nabiollahi, K.; Taghizadeh-Mehrjardi, R.; Eskandari, S. Assessing and Monitoring the Soil Quality of Forested and Agricultural Areas Using Soil-Quality Indices and Digital Soil-Mapping in a Semi-Arid Environment. *Arch. Agron. Soil Sci.* **2018**, *64*, 696–707, doi:10.1080/03650340.2017.1373188.
10. Yu, P.; Liu, S.; Zhang, L.; Li, Q.; Zhou, D. Selecting the Minimum Data Set and Quantitative Soil Quality Indexing of Alkaline Soils Under Different Land Uses in Northeastern China. *Sci. Total Environ.* **2018**, *616–617*, 564–571, doi:10.1016/j.scitotenv.2017.10.301.
11. Budak, M.; Gunal, H.; Celik, İ.; Yildiz, H.; Acir, N.; Acar, M. Soil Quality Assessment of Upper Tigris Basin. *Carpathian J. Earth Environ. Sci.* **2018**, *13*, 301–316, doi:10.26471/cjees/2018/013/026.
12. Chandel, S.; Hadda, M.S.; Mahal, A.K. Soil Quality Assessment Through Minimum Data Set Under Different Land Uses of Submontane Punjab. *Commun. Soil Sci. Plant Anal.* **2018**, *49*, 658–674, doi:10.1080/00103624.2018.1425424.
13. Mei, N.; Yang, B.; Tian, P.; Jiang, Y.; Sui, P.; Sun, D.; Zhang, Z.; Qi, H. Using a Modified Soil Quality Index to Evaluate Densely Tilled Soils with Different Yields in Northeast China. *Environ. Sci. Pollut. Res.* **2019**, *26*, 13867–13877, doi:10.1007/s11356-018-3946-2.
14. Klimkowicz-Pawlas, A.; Ukalska-Jaruga, A.; Smreczak, B. Soil Quality Index for Agricultural Areas under Different Levels of Anthropopressure. *Int. Agrophysics* **2019**, *33*, 455–462, doi:10.31545/intagr/113349.

15. Mahajan, G.; Das, B.; Morajkar, S.; Desai, A.; Murgaokar, D.; Kulkarni, R.; Sale, R.; Patel, K. Soil Quality Assessment of Coastal Salt-Affected Acid Soils of India. *Environ. Sci. Pollut. Res.* **2020**, *27*, 26221–26238, doi:10.1007/s11356-020-09010-w.
16. Zeraatpisheh, M.; Bakhshandeh, E.; Hosseini, M.; Alavi, S.M. Assessing the Effects of Deforestation and Intensive Agriculture on the Soil Quality through Digital Soil Mapping. *Geoderma* **2020**, *363*, 114139, doi:10.1016/j.geoderma.2019.114139.
17. Acir, N.; Günal, H. Soil Quality of a Cropland and Adjacent Natural Grassland in an Arid Region. *Carpathian J. Earth Environ. Sci.* **2020**, *15*, 275–288, doi:10.26471/cjees/2020/015/128.
18. Bedolla-Rivera, H.I.; Xochilt Negrete-Rodríguez, M. de la L.; Medina-Herrera, M. del R.; Gámez-Vázquez, F.P.; Álvarez-Bernal, D.; Samaniego-Hernández, M.; Gámez-Vázquez, A.J.; Conde-Barajas, E. Development of a Soil Quality Index for Soils under Different Agricultural Management Conditions in the Central Lowlands of Mexico: Physicochemical, Biological and Ecophysiological Indicators. *Sustainability* **2020**, *12*, 9754, doi:10.3390/su12229754.
19. Zhou, M.; Xiao, Y.; Li, Y.; Zhang, X.; Wang, G.; Jin, J.; Ding, G.; Liu, X. Soil Quality Index Evaluation Model in Responses to Six-Year Fertilization Practices in Mollisols. *Arch. Agron. Soil Sci.* **2020**, *68*, 180–194, doi:10.1080/03650340.2020.1827395.
20. Zhao, L.; Fan, M.; Song, J.; Peng, S.; He, Y.; Wei, Y.; Dai, Y.; Liu, G. A Preliminary Study on the Determination of the Fertilization Tolerance of an Entisol in the Yuanmou Dry-Hot River Valley Based on Soil Qualities in Plot Scale. *Sustainability* **2021**, *13*, 3626, doi:10.3390/su13073626.
21. Huang, W.; Zong, M.; Fan, Z.; Feng, Y.; Li, S.; Duan, C.; Li, H. Determining the Impacts of Deforestation and Corn Cultivation on Soil Quality in Tropical Acidic Red Soils Using a Soil Quality Index. *Ecol. Indic.* **2021**, *125*, 107580, doi:10.1016/j.ecolind.2021.107580.
22. Mahajan, G.R.; Manjunath, B.L.; Morajkar, S.; Desai, A.; Das, B.; Paramesh, V. Long-Term Effect of Various Organic and Inorganic Nutrient Sources on Rice Yield and Soil Quality in West Coast India Using Suitable Indexing Techniques. *Commun. Soil Sci. Plant Anal.* **2021**, *52*, 1819–1833, doi:10.1080/00103624.2021.1900221.
